# Supplementary material for: Ordered mesoporous silica microspheres for supercritical fluid chromatography
Source: Royal Society of Chemistry journal article supplement (doi:10.1039/d3cc05690b), 2024-01-01
Supplement: d3cc05690b1.pdf [file d3cc05690b1.pdf]

## Supporting Information

### Ordered Mesoporous Silica Microsphere for Supercritical Fluid Chromatography

Chunying Song<sup>ab</sup>, Yi Qi<sup>c</sup>, Chenyu Wang<sup>c</sup>, Gaowa Jin<sup>a</sup>, Shengfu Wang<sup>c</sup>, Dongping Yu<sup>c</sup>, Zhimou Guo<sup>a\*</sup>, Xinmiao Liang<sup>a\*</sup>

#### Experimental section

**Chemicals and materials:** HPLC-grade methanol (MeOH), isopropyl alcohol (IPA), and n-hexane were purchased from J&K (Beijing, China). All analytes of Table S1 were obtained from Macklin (Shanghai, China) and dissolved in MeOH at a concentration of 1 mg/mL. The analytes of Table S6 were either purchased from different manufacturers. Their chemical structures and detailed information were listed in Table S6. Tetraethoxysilane (TEOS, 98%), 3-mercaptopropyltriethoxysilane and dodecylamine (DDA) were purchased from Sigma-Aldrich (St. Louis, MO, USA). Water was purified using a Milli-Q purification system (Billerica, MA, USA). Spherical silica (2.5  $\mu\text{m}$  particle size, 100 Å pore size) was purchased from Fuji Silysia Chemical (Kasugai, Japan). High-purity grade carbon dioxide (99.99%) was purchased from Jiangxi East-China Special Gases Co., Ltd (Nanchang, China). The extract of *Salvia miltiorrhiza* Bunge was prepared in our laboratory. PIC column was supplied by Waters (Milford, MA, USA), with 150 mm  $\times$  4.6 mm I.D. and 5  $\mu\text{m}$  particle size. NH2 (100 mm  $\times$  4.6 mm, 3.5  $\mu\text{m}$ ), and Diol (100 mm  $\times$  4.6 mm, 3.5  $\mu\text{m}$ ) columns were from Acchrom (Beijing, China). The stainless-steel column tubes (100 mm  $\times$  4.6 mm, 100 mm  $\times$  3 mm, 50 mm  $\times$  4.6 mm) and sieve plate (0.5  $\mu\text{m}$ ) were purchased from IDEX (Northbrook, IL, USA).

**Synthesis and column packing:** OMS was synthesized according to previously reported method<sup>1</sup>. For 2.33  $\mu\text{m}$  particle size, dodecylamine (7.2 mL) with a concentration of 40 mmol/L was added into a mixture containing 360 mL methanol and 150 mL water. After dodecylamine was well dissolved, 28.8 mL TEOS was added and the solution was vigorously stirred at 30 °C until the solution turned opaque. Then, the mixture was maintained under static condition for 24 h until the formed particles were

settled down to the flask bottom. After removing the liquid by centrifugation, the precipitates were washed with massive water and methanol. The products were dried at 80 °C for 24 h and calcined at 600 °C for 8 h. The prepared sample was designated as 2.33 μm OMS. For 1.10 μm OMS preparation, the only change is the concentration of dodecylamine was adjusted to 120 mmol/L. For chromatographic evaluations, 1.8 g 2.33 μm OMS was slurry-packed into a stainless-steel column (100 × 4.6 mm I.D.) under 60 MPa using methanol as slurry solvent and isopropyl alcohol as propulsion solvent. 1 g 1.10 μm OMS and 1 g OMS-SH were respectively slurry-packed into a stainless-steel column (50 × 4.6 mm I.D.) under 50 MPa using methanol as slurry solvent and isopropyl alcohol as propulsion solvent.

***Instrument and characterization:*** SFC separation was performed on Agilent 1260 Infinity SFC Analytical System, which includes binary solvent delivery pump, autosampler, column manager, photodiode array detector, and back pressure regulator. Data acquisition and control of the equipment were carried out on the OpenLab CDS software. Van Deemter curves were tested on a Waters Corporation ACQUITY Ultra Performance Convergence Chromatography™ (UPC<sup>2</sup>). It was equipped with a binary solvent delivery pump compatible with mobile phase flow rates up to 4 mL/min and pressures up to 414 bar, an autosampler (with a 10-μL loop), a column manager, an automatic back pressure regulator (ABPR), and a photodiode-array (PDA) detector. SEM images were obtained on FlexSEM 1000 II with 3.5 kV accelerating voltage and 10 nm probe distance. TEM images were obtained on FEI Talos F200s with 100 kV operating voltage. High resolution TEM photograph of 2.33 μm OMS was obtained from FEI Titan Themis ETEM G3 200 kV operating voltage. Nitrogen sorption experiments were performed on QuadraSorb evo surface area/pore size analyzer. Surface area and pore size distribution were calculated using Brunauer–Emmett–Teller (BET) and non-local density functional theory (NLDFT) method. Small-angle X-ray scattering (SAXS) patterns were obtained on Xeuss 2.0 (xenocs, France) with Cu K $\alpha$  radiation beam ( $\lambda = 1.5418 \text{ \AA}$ ) in the  $2\theta$  range of 0-8° at room temperature. When identifying tanshinone components, the SFC system was coupled to an Agilent 6540 Q-TOF spectrometry system equipped with an electrospray ionization interface. For

MS detection, the ESI† source was operated in positive ion mode to acquire MS/MS spectra. The collision energy was 40 eV and 20 eV, and the MS and MS/MS ranges of data acquisition were 100-1000 Da. MassHunter 10.0 software (Agilent) was used for data acquisition and to control the Q-TOF mass spectrometry system. X-ray photoelectron spectroscopy (XPS) measurements were performed under high vacuum conditions using a Physical Electronics PHI 5000 VersaProbe XPS spectrometer with monochromatic Al K $\alpha$  radiation (1486.6 eV) equipped with a hemispherical energy analyzer. Vario EL III elemental analyzer was applied to obtain the elemental analysis results of modified OMS (OMS-SH). The mean diameters of OMS, OMS-SH and silica gel were examined by a laser particle size analyzer (Brookhaven, 90plus). The mean diameter of 1.10  $\mu\text{m}$  OMS was tested by nanometer particle size potentiometer with higher precision (Malvern Panalytical Nano-ZS90).

***Test conditions for Van Deemter curves and column efficiency:*** The BPR pressure was set to 2100 psi ( $\approx$ 145 bar), the mobile phases included A (supercritical fluid CO<sub>2</sub>) and B (methanol). For 2.33  $\mu\text{m}$  OMS (100  $\times$  3 mm I.D.), the A/B = 85/15 (v/v), and the flow rate ranges from 0.2 to 4.0 mL/min. For 1.10  $\mu\text{m}$  OMS (50  $\times$  4.6 mm I.D.), the A/B = 80/20 (v/v), and the flow rate ranges from 0.2 to 2.4 mL/min. For the above separations, the column temperature was maintained at 35  $^{\circ}\text{C}$ , and the UV detector was set to 254 nm. The structure of the analyte used is listed in Table S6. the mobile phases included A (supercritical fluid CO<sub>2</sub>) and B (methanol).

***Test conditions for the retention behaviors:*** The BPR temperature and pressure were set to 60  $^{\circ}\text{C}$  and 150 bar, respectively. The mobile phases included mobile phases A (supercritical fluid CO<sub>2</sub>) and B (methanol) at a flow rate of 3.0 mL/min. The column temperature was maintained at 35  $^{\circ}\text{C}$ , and the UV detector was set to 215 nm and 254 nm. Gradient elution was performed as follows: For retention mechanism: 0.0 min-15.0 min, 95%-65% (A). For retention characteristics: 0.0 min-10.0 min, 98%-60% (A). The structures of the analytes used are listed in Table S6.

***Test conditions for weakly retained compounds:*** The BPR temperature was 60  $^{\circ}\text{C}$  and the pressure was 150 bar. The mobile phases included A (supercritical fluid CO<sub>2</sub>) and B (methanol). The column temperature was maintained at 35  $^{\circ}\text{C}$  and the UV

detector was set at 210 nm. When separating unsaturated fatty acids, adopting isocratic elution, A/B = 99/1 (v/v), and the flow rate was 2.0 mL/min. When four tocopherol derivatives of vitamin E were separated, the gradient elution: 0.0 min-10.0 min, 99%-90% (A), 10.0 min-15.0 min, 90% (A) at a flow rate was 3.0 mL/min. When separating PLA, EPA, and DHA, neat supercritical CO<sub>2</sub> was used at a flow rate of 3.0 mL/min. The structures of the analytes used are listed in Table S6.

**Test conditions for polar compounds:** The BPR temperature was 60 °C and the pressure was 150 bar. The column temperature was maintained at 35°C, the UV detector was set at 254 nm and the flow rate was 3.0 mL/min. Comparison of retention strength: For OMS: Mobile phases were A (supercritical fluid CO<sub>2</sub>) and B (methanol), A/B = 82/18 (v/v). While for silica gel: A/B = 90/10 (v/v). Separation of flavonoids: 0.0 min-10.0 min, 90%-65% (A). Separation of alkaloids: 0.0 min-10.0 min, 95%-65% (A). The structures of the analytes used are listed in Table S6.

**Test conditions for *Salvia miltiorrhiza* Bunge:** The BPR temperature was 60 °C and the pressure was 150 bar. When five standard compounds of *Salvia miltiorrhiza* Bunge were separated, the gradient elution was adopted. The mobile phases included A (supercritical fluid CO<sub>2</sub>) and B (methanol). For other commercial columns: 0.0 min-10.0 min, 98%-65% (A) a flow rate was 3.0 mL/min, while for 2.33 μm OMS: 0.0 min-7.5 min, 85%-65% (A) at a flow rate was 3.0 mL/min, for 1.10 μm OMS: 0.0 min-7.5 min, 82%-65% (A) at a flow rate was 2.0 mL/min. When the extract of *Salvia miltiorrhiza* Bunge was separated, the gradient elution of OMS was 0.0 min-10.0 min, 98%-60% (A).

## Supplementary figures

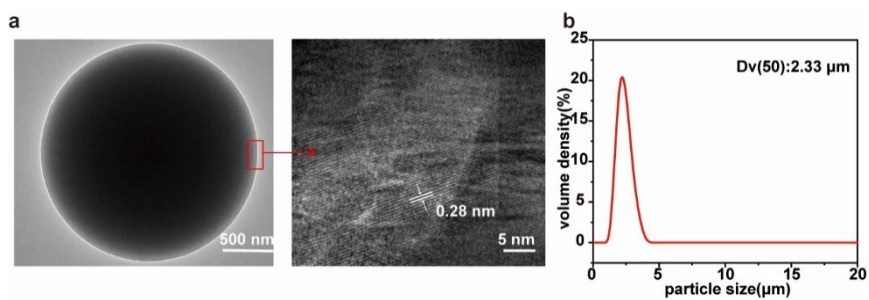

**Figure S1.** Characterization of 2.33  $\mu\text{m}$  OMS particles. a) TEM micrograph. b) Particle size distribution measured by the dynamic light scattering.

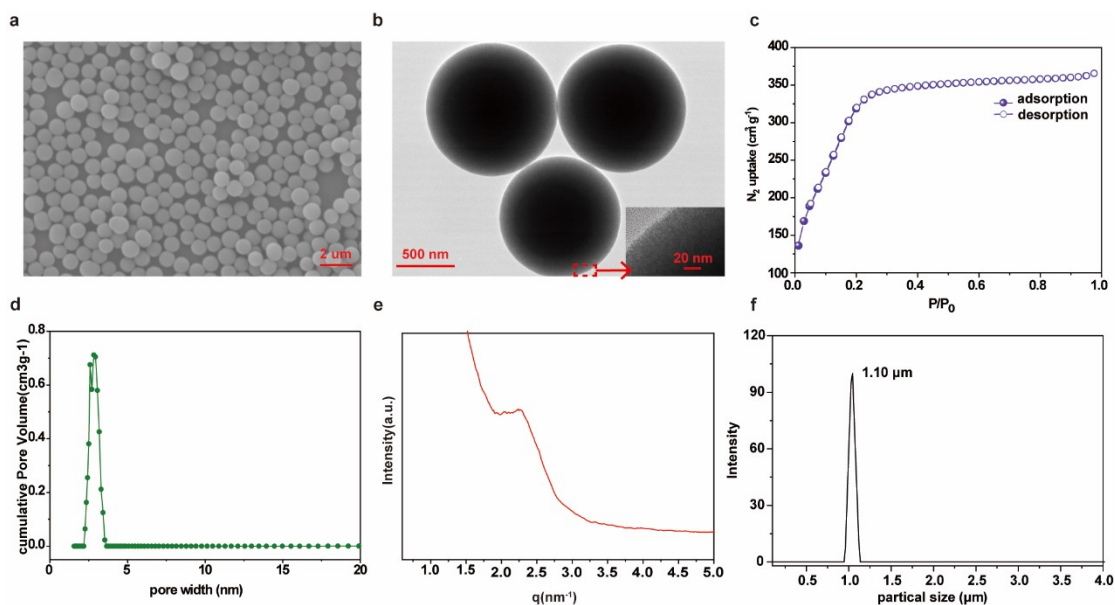

**Figure S2.** Characterization of 1.10  $\mu\text{m}$  OMS particles. a) SEM micrograph. b) TEM micrograph. c) Nitrogen adsorption isotherms. d) Pore width calculated through NLDFT models. e) SAXS pattern. f) Particle size distribution measured by nanometer particle size potentiometer.

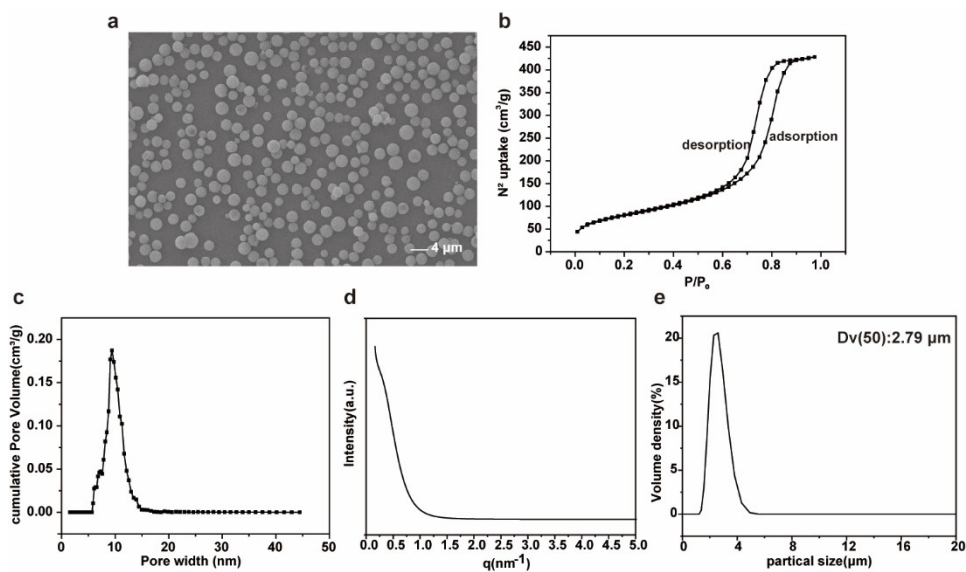

**Figure S3.** Characterization of conventional silica gel. a) SEM micrograph. b) Nitrogen adsorption isotherms. c) Pore width calculated through NLDFT models. d) SAXS pattern. e) Particle size distribution measured by the dynamic light scattering.

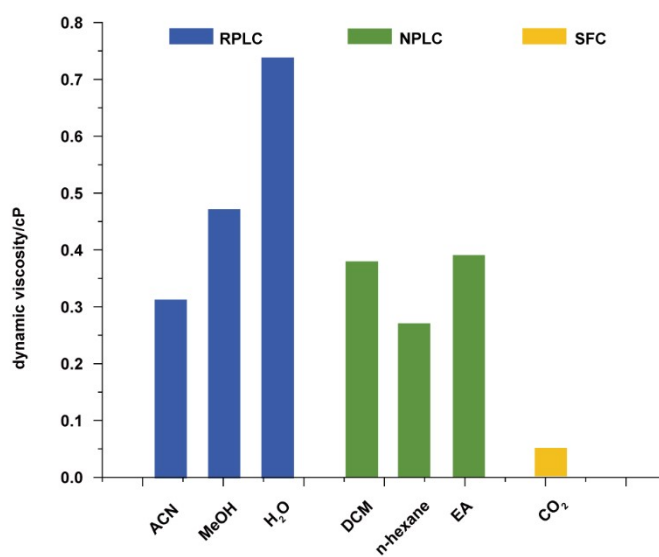

**Figure S4.** Comparison of the dynamic viscosity of the mobile phases used in different chromatographic modes. The test conditions: temperature is 35 °C and the pressure is 2000 psi ( $\approx 138$  bar).

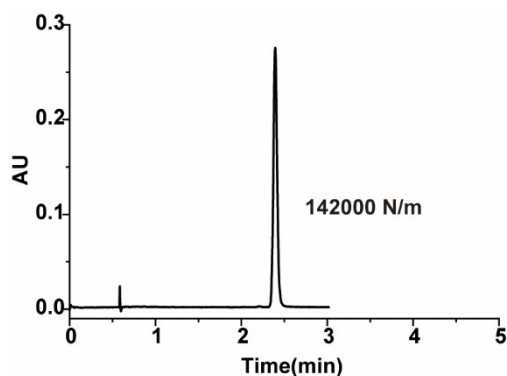

**Figure S5.** The chromatogram of optimal column efficiency for conventional silica gel. The chromatographic conditions: The BPR pressure was set to 2100 psi ( $\approx 145$  bar), the mobile phases included A (supercritical fluid  $\text{CO}_2$ ) and B (methanol), the A/B = 85/15 (v/v), and the flow rate is 1.5 mL/min. The column temperature was maintained at 35 °C, and the UV detector was set to 254 nm.

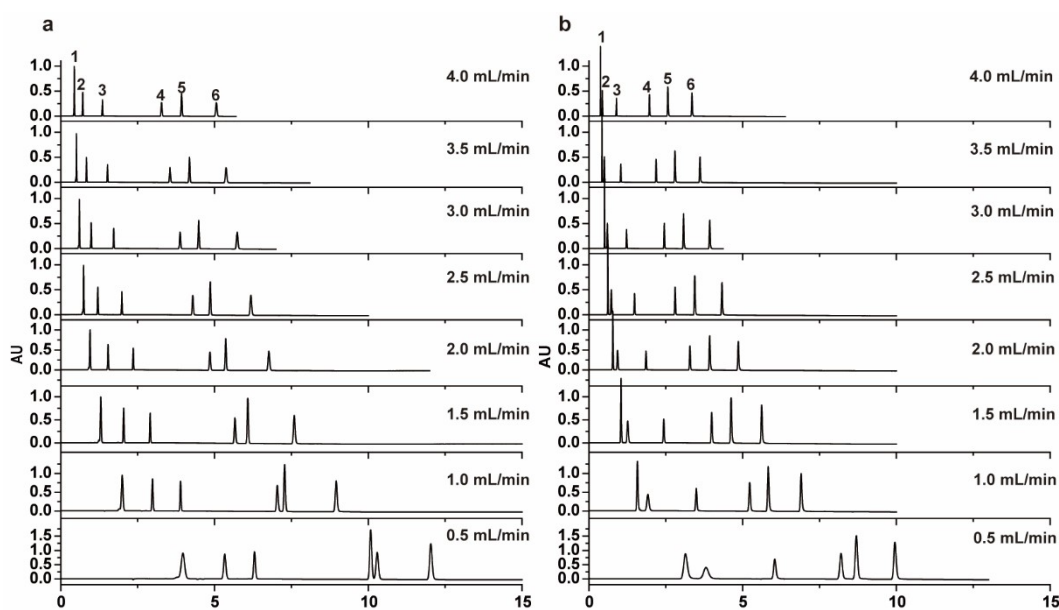

**Figure S6.** The chromatograms with common hydrophobic and hydrophilic analyte mixtures at different flow rates. a) The chromatograms of OMS. b) The chromatograms of conventional silica gel. The chromatographic conditions: The BPR pressure was set to 2100 psi ( $\approx 145$  bar), the mobile phases included A (supercritical fluid  $\text{CO}_2$ ) and B (methanol). The gradient elution: 0.0 min-10.0 min, 95%-65% (A) (v/v), and the flow rate ranges from 0.5 to 4.0 mL/min. The column temperature was maintained at 35 °C, and the UV detector was set to 215 nm. Peak 1: fluorene; Peak 2: benzoic acid; Peak 3: butyl p-hydroxybenzoate; Peak 4: thymine; Peak 5: phloroglucinol;

Peak 6: uridine.

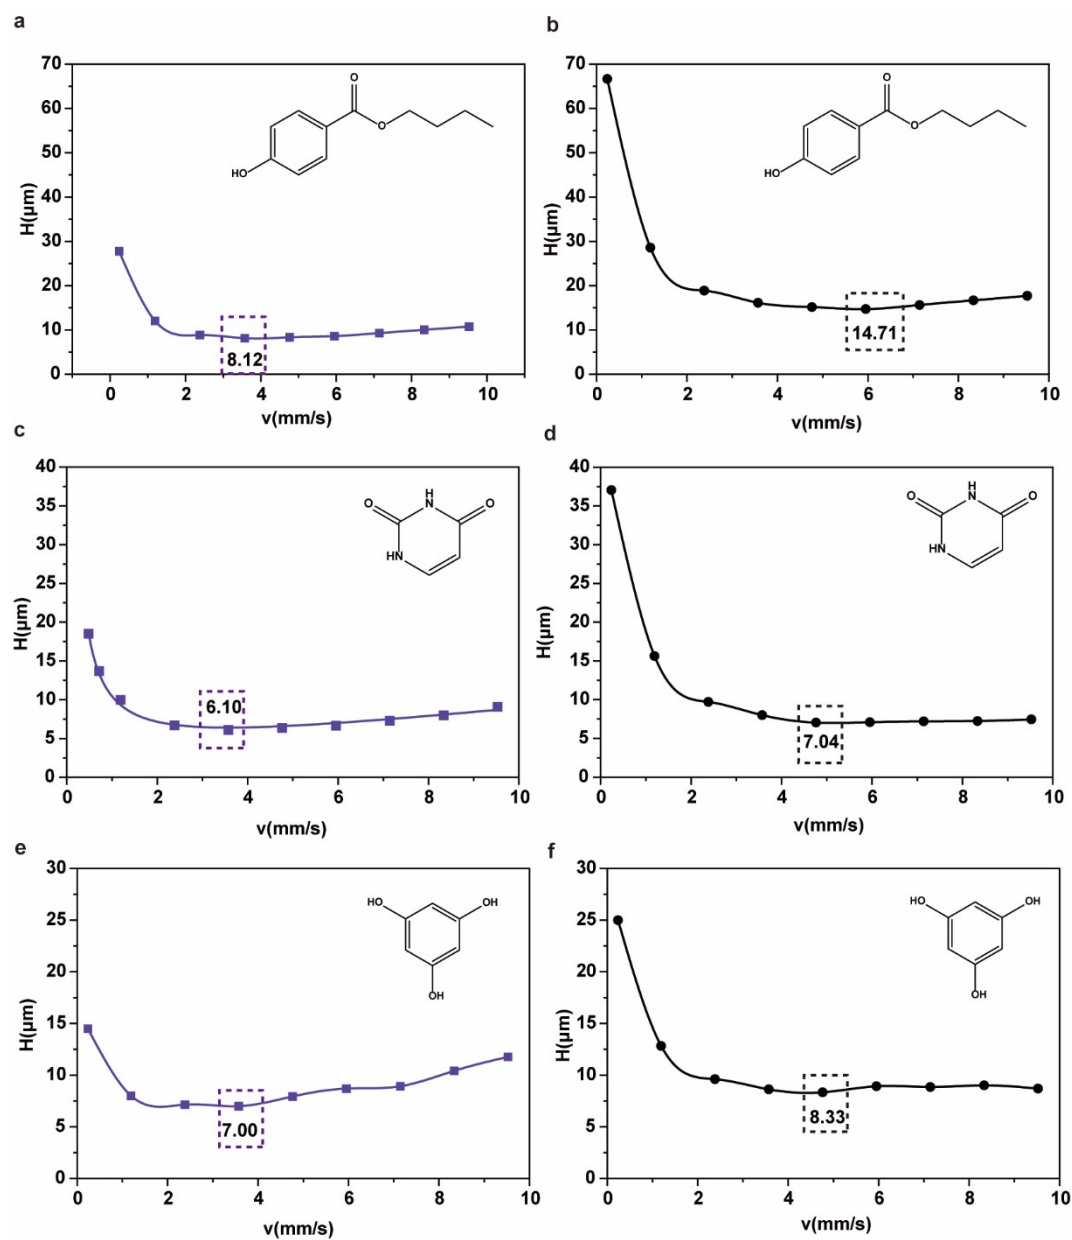

**Figure S7.** The Van-Deemter plots for different analytes. a, c, e) The results of OMS. b, d, f) The result of conventional silica gel. The chromatographic conditions: The BPR pressure was set to 2100 psi ( $\approx 145$  bar), the mobile phases included A (supercritical fluid  $\text{CO}_2$ ) and B (methanol). For butyl p-hydroxybenzoate, the A/B = 95/5 (v/v); For uracil, the A/B = 85/15 (v/v); For phloroglucinol, the A/B = 80/20 (v/v). The column temperature was maintained at 35  $^\circ\text{C}$ , and the UV detector was set to 215 nm.



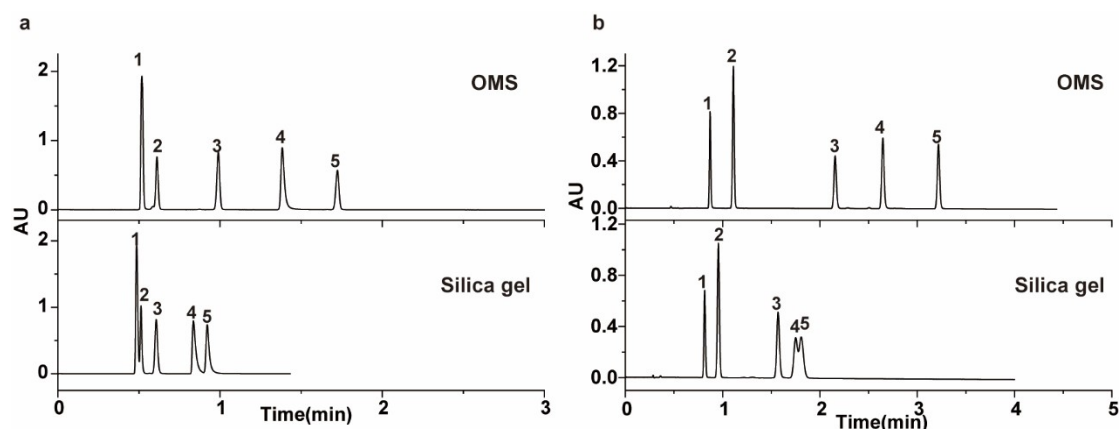

**Figure S8.** Chromatograms for separation of different analytes. a) Peak 1: naphthalene; Peak 2: fluorene; Peak 3: dimethyl phthalate; Peak 4: benzoic acid; Peak 5: aniline. b) Peak 1: coumarin; Peak 2: flavone; Peak 3: caffeine; Peak 4: thymine; Peak 5: prednisone. The chromatographic conditions: The BPR pressure was set to 2100 psi ( $\approx 145$  bar), the mobile phases included A (supercritical fluid  $\text{CO}_2$ ) and B (methanol). For a), the gradient elution: 0.0 min-5 min, 92%-95% (A) (v/v); For b), the gradient elution: 0.0 min-10 min, 95%-65% (A) (v/v); The column temperature was maintained at 35  $^\circ\text{C}$ , and the UV detector was set to 215 nm.

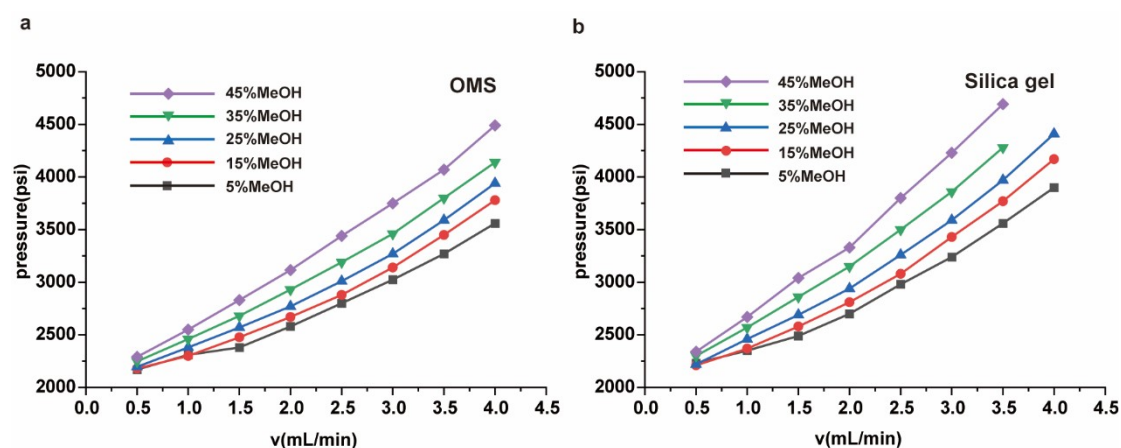

**Figure S9.** Comparison of back pressure/flow curves at different additive ratios. a) The results of OMS; b) The results of conventional silica. The chromatographic conditions: The BPR pressure was set to 2100 psi ( $\approx 145$  bar), the mobile phases included A (supercritical fluid  $\text{CO}_2$ ) and B (methanol). The purple line: 45%B (v/v); The green line: 35%B (v/v); The blue line: 25%B (v/v); The red line: 15%B (v/v); The black line: 5%B (v/v); The column temperature was maintained at 35  $^\circ\text{C}$ , and the UV detector was set to 215 nm.

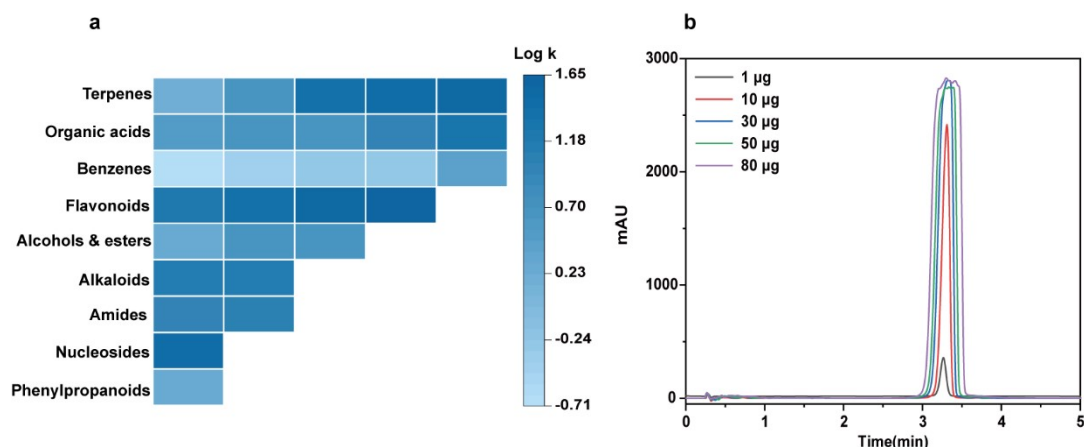

**Figure S10.** Retention mechanism of OMS in SFC. a) Heatmap of retention factors and compound types. b) Effect of injected analytes mass of estradiol. The chromatographic conditions: The BPR pressure was set to 2100 psi ( $\approx 145$  bar), the mobile phases included A (supercritical fluid  $\text{CO}_2$ ) and B (methanol), the A/B = 85/15 (v/v). The column temperature was maintained at 35 °C, and the UV detector was set to 215 nm.

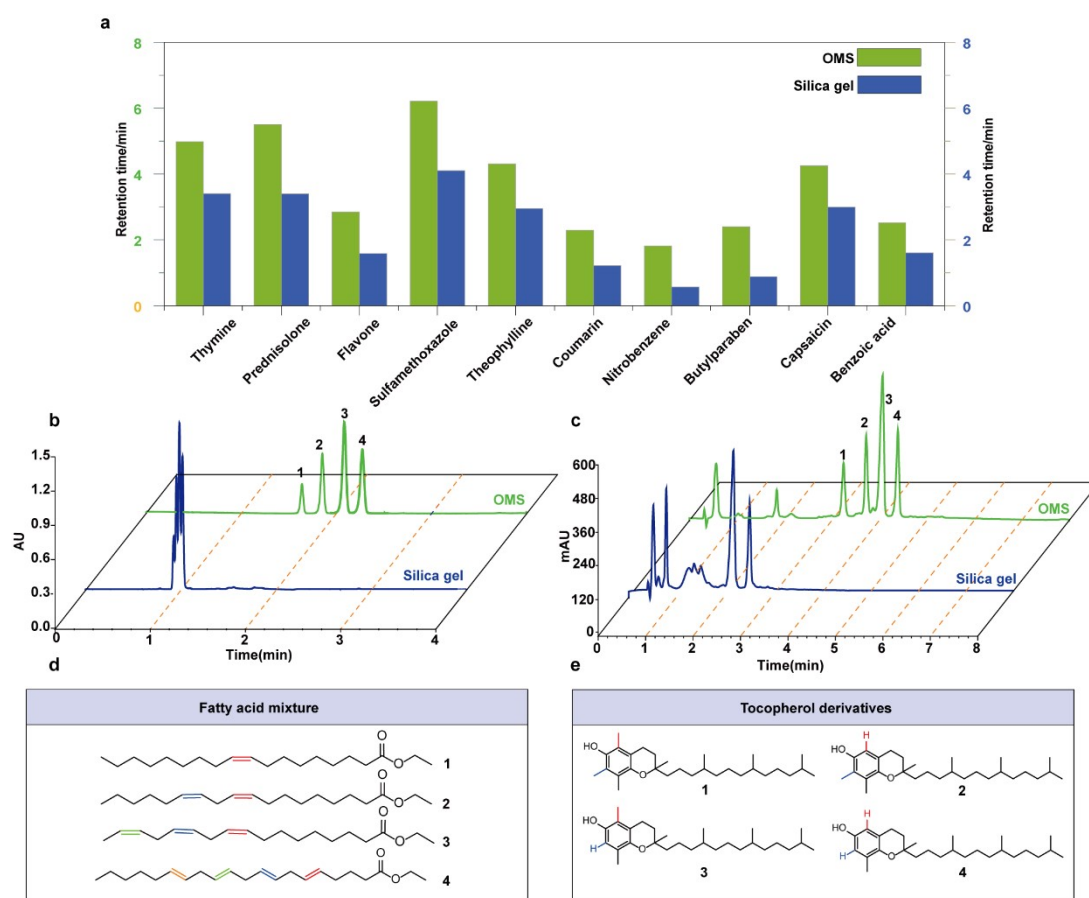

**Figure S11.** Retention characteristics of OMS during separation. a) The retention of different

compounds by OMS and silica gel was compared. b) Separation of unsaturated fatty acids. c) Separation of vitamin E derivatives. d) Structure diagram of unsaturated fatty acids. e) Structure diagram of vitamin E derivatives. The BPR temperature was 60 °C and the pressure was 150 bar.

The mobile phases included A (supercritical fluid CO<sub>2</sub>) and B (methanol). The column temperature was maintained at 35 °C and the UV detector was set at 210 nm. For a): the gradient elution: 0.0 min-10.0 min, 98%-60% (A) at a flow rate was 3.0 mL/min; For b), adopting isocratic elution, A/B = 99/1 (v/v), and the flow rate was 2.0 mL/min. For c), the gradient elution: 0.0 min-10.0 min, 99%-90% (A) at a flow rate was 3.0 mL/min.

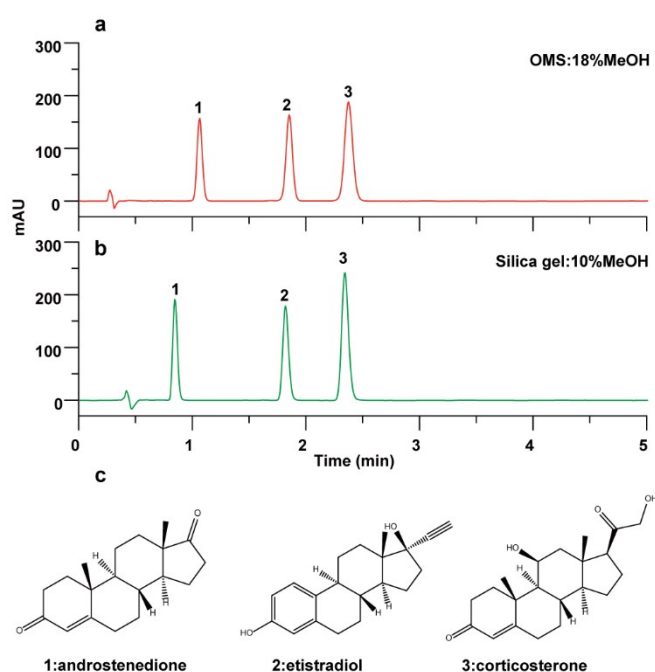

**Figure S12.** Comparison of elution strength. a) Retention of compounds on OMS. b) Retention of compounds on silica gel. c) Structure diagram. The BPR temperature was 60 °C and the pressure was 150 bar. The mobile phases included A (supercritical fluid CO<sub>2</sub>) and B (methanol). The column temperature was maintained at 35 °C, the UV detector was set at 254 nm and the flow rate was 3.0 mL/min.

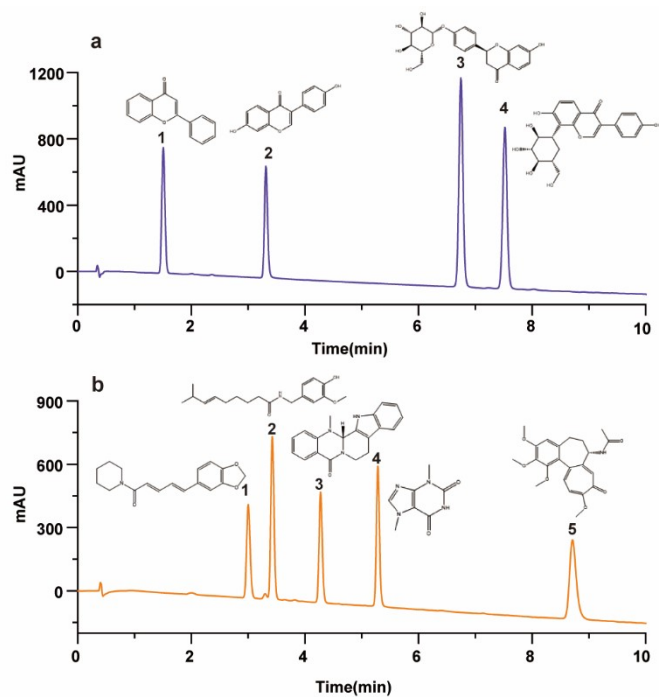

**Figure S13.** Separation of polar compounds on OMS. a) Separation results of flavonoids. b) Separation results of alkaloids. The BPR temperature was 60 °C and the pressure was 150 bar. The column temperature was maintained at 35 °C, the UV detector was set at 254 nm and the flow rate was 3.0 mL/min. For a): 0.0 min-10.0 min, 90%-65% (A). For b): 0.0 min-10.0 min, 95%-65% (A).

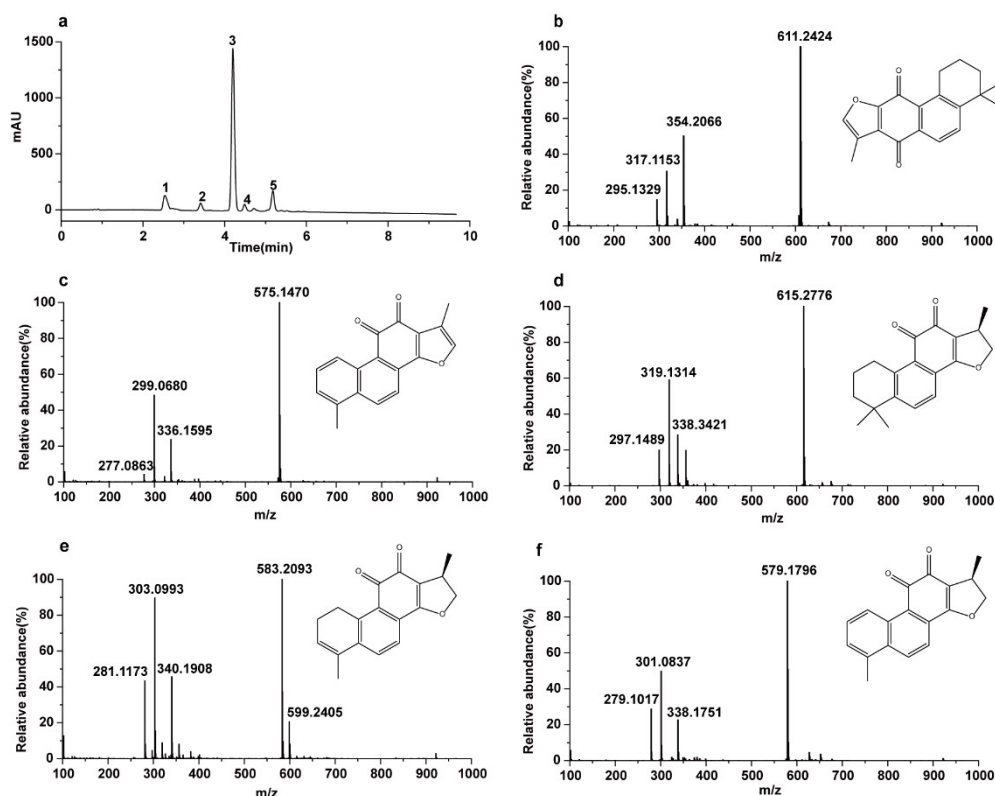

**Figure S14.** Separation and identification the extract of *Salvia miltiorrhiza* Bunge using SFC-MS. a) Separation of the extract by OMS. Mass spectrum of b) the first peak. c) the second peak. d) the third peak. e) the fourth peak. f) the fifth peak. The BPR temperature was 60 °C and the pressure was 150 bar. The mobile phases included A (supercritical fluid CO<sub>2</sub>) and B (methanol). The gradient elution of OMS was 0.0 min-10.0 min, 98%-60% (A) at a flow rate of 3.0 mL/min.

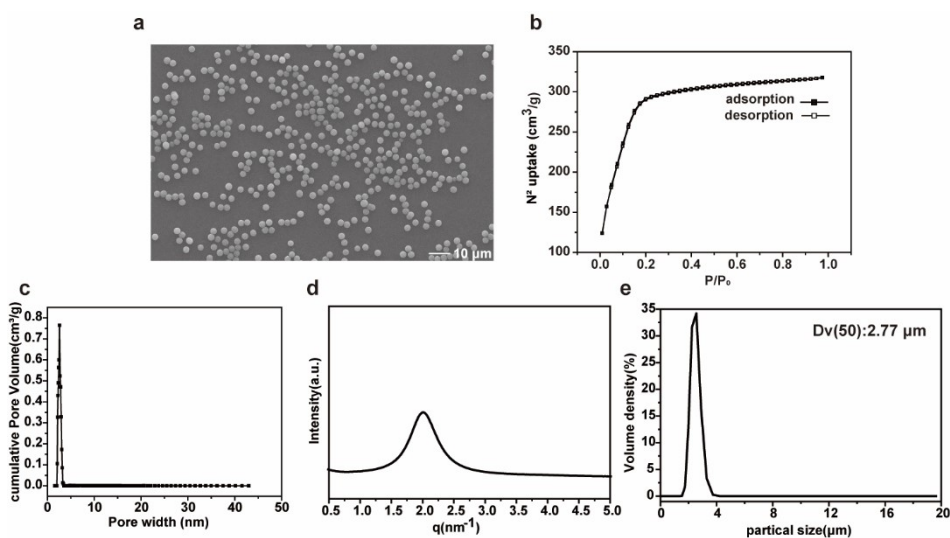

**Figure S15.** Characterization of OMS-SH. a) SEM micrograph. b) Nitrogen adsorption isotherms.

c) Pore width calculated through NLDFT models. d) SAXS pattern. e) Particle size distribution measured by the dynamic light scattering.

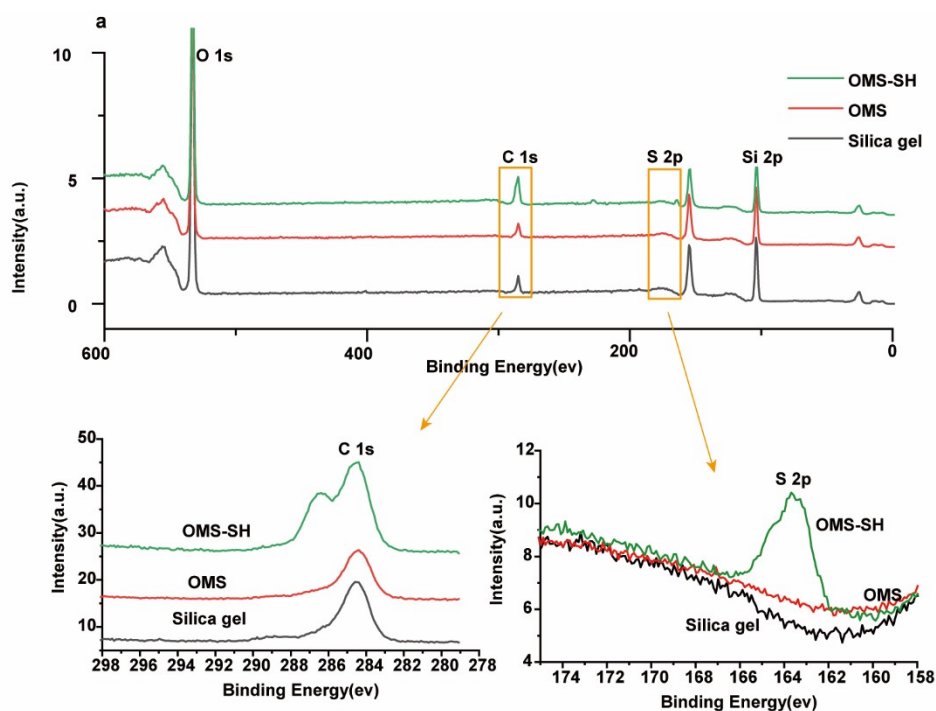

Figure S16. XPS spectrum of three materials.

Table S1. Particle size distribution and pore structure properties of particles

|             | surface area<br>(m <sup>2</sup> /g) | pore diameter<br>(nm) | particle size<br>(μm) | source                                  |
|-------------|-------------------------------------|-----------------------|-----------------------|-----------------------------------------|
| Silica gel  | 286                                 | 9.4                   | 2.79                  | purchased from Fuji<br>Silysia Chemical |
| 2.33 μm OMS | 1183                                | 2.5                   | 2.33                  | synthesis                               |
| 1.10 μm OMS | 1294                                | 2.8                   | 1.10                  | synthesis                               |
| OMS-SH      | 1149                                | 2.6                   | 2.77                  | synthesis                               |

Table S2. Summary of structures and properties of analytes used in Figure 3.

| Compound name           | Compound structure | CAS      | M.V.   | logP/ACD    | Logk |
|-------------------------|--------------------|----------|--------|-------------|------|
| No.1<br>Trimesitic acid |                    | 554-95-0 | 210.14 | 0.081±0.249 | 1.26 |
| No.2<br>m-Phthalic acid |                    | 121-91-5 | 166.13 | 0.860±0.230 | 1.02 |

|       |                            |                                                                                     |           |        |              |       |
|-------|----------------------------|-------------------------------------------------------------------------------------|-----------|--------|--------------|-------|
| No.3  | Benzeneformic acid         | 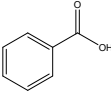   | 65-85-0   | 122.12 | 1.559±0.206  | 0.51  |
| No.4  | 2-Naphthoic acid           |    | 93-09-4   | 172.18 | 2.743±0.208  | 0.69  |
| No.5  | 4-Biphenylacetic acid      |    | 5728-52-9 | 212.24 | 3.260±0.256  | 0.69  |
| No.6  | Biphenyl                   |    | 92-52-4   | 154.21 | 4.091±0.235  | -0.29 |
| No.7  | 1-Fluoronaphthalene        |    | 321-38-0  | 146.16 | 3.488±0.278  | -0.31 |
| No.8  | Ethylbenzene               |    | 100-41-4  | 106.17 | 3.229±0.169  | -0.71 |
| No.9  | Bromobenzene               |    | 108-86-1  | 157.01 | 2.936±0.277  | -0.45 |
| No.10 | Nitrobenzene               |   | 98-95-3   | 123.11 | 1.921±0.166  | 0.39  |
| No.11 | Benzyl alcohol             |  | 100-51-6  | 108.14 | 1.055±0.206  | 0.68  |
| No.12 | Uracil                     |  | 58-96-8   | 244.20 | -1.581±0.321 | 1.46  |
| No.13 | p-Toluenesulfonamide       |  | 70-55-3   | 171.22 | 0.971±0.207  | 1.02  |
| No.14 | N-Benzylbenzenesulfonamide |  | 837-18-3  | 247.31 | 1.882±0.313  | 0.98  |
| No.15 | Dimethyl phthalate         |  | 131-11-3  | 194.18 | 1.695±0.253  | 0.23  |
| No.16 | Butylparaben               |  | 94-26-8   | 194.23 | 3.410±0.224  | 0.66  |
| No.17 | Eugenol                    |  | 97-53-0   | 164.20 | 2.403±0.236  | 0.30  |

|       |                           |                                                                                     |            |        |             |      |
|-------|---------------------------|-------------------------------------------------------------------------------------|------------|--------|-------------|------|
| No.18 | Andrographolid            | 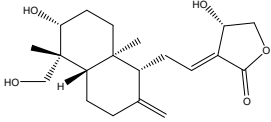   | 5508-58-7  | 350.45 | 0.424±0.430 | 1.42 |
| No.19 | Phytol                    |    | 150-86-7   | 296.53 | 8.230±0.255 | 0.23 |
| No.20 | Antixerophthalmic vitamin |    | 68-26-8    | 286.45 | 6.078±0.324 | 0.68 |
| No.21 | Kirenol                   |    | 52659-56-0 | 338.48 | 1.900±0.381 | 1.56 |
| No.22 | Paclitaxel                |    | 33069-62-4 | 853.91 | 3.950±0.808 | 1.41 |
| No.23 | Taxifolin                 |    | 480-18-2   | 304.25 | 1.569±0.555 | 1.36 |
| No.24 | Baikalein                 |   | 491-67-8   | 270.24 | 3.641±0.517 | 1.22 |
| No.25 | Liquiritoside             |  | 551-15-5   | 418.39 | 0.280±0.409 | 1.56 |
| No.26 | Puerarin                  |  | 3681-99-0  | 416.38 | 0.408±1.243 | 1.65 |
| No.27 | Capsaicine                |  | 404-86-4   | 305.41 | 3.217±0.392 | 1.12 |
| No.28 | d-Evodiamine              |  | 518-17-2   | 303.36 | 3.888±0.871 | 1.14 |

Table S3. Summarizing the chromatographic column used in this paper

|                         | pore diameter<br>(nm) | particle size<br>( $\mu\text{m}$ ) | Column size   | source                                  | application                                         |
|-------------------------|-----------------------|------------------------------------|---------------|-----------------------------------------|-----------------------------------------------------|
| *2.33 $\mu\text{m}$ OMS | 2.5                   | 2.33                               | 4.6 mm*100 mm | synthesis                               | All tests in this paper<br>except Van Deemter curve |
| *2.33 $\mu\text{m}$ OMS | 2.5                   | 2.33                               | 3 mm*100 mm   | synthesis                               | Van Deemter curve                                   |
| *1.10 $\mu\text{m}$ OMS | 2.8                   | 1.10                               | 4.6 mm*50 mm  | synthesis                               | All tests in this paper                             |
| *Silica gel             | 9.4                   | 2.79                               | 4.6 mm*100 mm | purchased from Fuji<br>Silysia Chemical | All tests in this paper<br>except Van Deemter curve |



|             |     |      |               |                                      |                                                                          |
|-------------|-----|------|---------------|--------------------------------------|--------------------------------------------------------------------------|
| *Silica gel | 9.4 | 2.79 | 3 mm*100 mm   | purchased from Fuji Silysia Chemical | Van Deemter curve                                                        |
| NH2         | 10  | 3.5  | 4.6 mm*100 mm | purchased from Acchrom               | Separation of five principal compounds of <i>Salvia miltiorrhiza</i> Bge |
| Diol        | 10  | 3.5  | 4.6 mm*100 mm | purchased from Acchrom               | Separation of five principal compounds of <i>Salvia miltiorrhiza</i> Bge |
| PIC         | 10  | 3.5  | 4.6 mm*150 mm | purchased from Waters                | Separation of five principal compounds of <i>Salvia miltiorrhiza</i> Bge |
| *OMS-SH     | 2.6 | 2.77 | 4.6 mm*50 mm  | synthesis                            | Separation of DHA, PLA and EPA by OMS-SH                                 |

\*Column packing is done in our laboratory.

Table S4. Relative elemental surface composition by XPS for conventional silica, OMS, and OMS-SH

|            | C (%) | O (%) | Si (%) | S (%) |
|------------|-------|-------|--------|-------|
| Silica gel | 8.43  | 63.16 | 28.41  | 0     |
| OMS        | 8.35  | 62.8  | 28.85  | 0     |
| OMS-SH     | 18.6  | 55.8  | 24.12  | 1.48  |

Table S5. Elemental analysis results of OMS-SH

|        | N (%) | C (%) | H (%) | S (%) |
|--------|-------|-------|-------|-------|
| OMS-SH | 0.000 | 4.783 | 1.729 | 3.009 |

Table S6. Summary of detailed information of analytes used in the paper.

| Compound name | Compound structure | CAS                                                                                 | M.V.     | manufacturer | Source        |          |
|---------------|--------------------|-------------------------------------------------------------------------------------|----------|--------------|---------------|----------|
| No.1          | Uracil             | 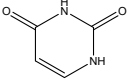 | 66-22-8  | 112.09       | Macklin       | Fig.2    |
| No.2          | Thymine            |  | 65-71-4  | 126.11       | Macklin       | Fig.S11a |
| No.3          | Cortalone          |  | 50-24-8  | 360.44       | Sigma-Aldrich | Fig.S11a |
| No.4          | Flavone            |  | 525-82-6 | 222.24       | Macklin       | Fig.S11a |

|       |                     |                                                                                     |            |        |                                                   |          |
|-------|---------------------|-------------------------------------------------------------------------------------|------------|--------|---------------------------------------------------|----------|
| No.5  | Sulphamethoxazole   | 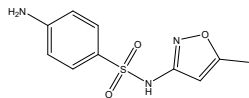   | 723-46-6   | 253.28 | Sigma-Aldrich                                     | Fig.S11a |
| No.6  | Theophylline        |    | 58-55-9    | 180.16 | Macklin                                           | Fig.S11a |
| No.7  | Coumarin            |    | 91-64-5    | 146.14 | Acros                                             | Fig.S11a |
| No.8  | Nitrobenzene        |    | 98-95-3    | 123.11 | Macklin                                           | Fig.S11a |
| No.9  | Dimethyl phthalate  |    | 131-11-3   | 194.18 | Macklin                                           | Fig.S11a |
| No.10 | Capsaicine          |    | 404-86-4   | 305.41 | Macklin                                           | Fig.S11a |
| No.11 | 2-Naphthoic acid    |    | 93-09-4    | 172.18 | Macklin                                           | Fig.S11a |
| No.12 | Ethyl oleate        |   | 111-62-6   | 310.52 | J&K Scientific                                    | Fig.S11b |
| No.13 | Ethyl linoleate     |  | 544-35-4   | 308.50 | J&K Scientific                                    | Fig.S11b |
| No.14 | Ethyl linolenate    |  | 1191-41-9  | 306.48 | J&K Scientific                                    | Fig.S11b |
| No.15 | Ethyl arachidonate  |  | 1808-26-0  | 332.52 | J&K Scientific                                    | Fig.S11b |
| No.16 | (±)-α-Tocopherol    |  | 10191-41-0 | 430.71 | prepared in our laboratory                        | Fig.S11c |
| No.17 | β-Tocopherol        |  | 148-03-8   | 416.68 | prepared in our laboratory                        | Fig.S11c |
| No.18 | γ-Tocopherol        |  | 54-28-4    | 416.68 | prepared in our laboratory                        | Fig.S11c |
| No.19 | δ-Tocopherol        |  | 119-13-1   | 402.65 | prepared in our laboratory                        | Fig.S11c |
| No.20 | Methyl tanshinonate |  | 18887-19-9 | 338.35 | the National Institutes for Food and Drug Control | Fig.4    |
| No.21 | Tanshinone I        |  | 568-73-0   | 276.29 | the National Institutes for Food and Drug Control | Fig.4    |

|       |                                                   |                                                                                     |             |        |                                                   |                    |
|-------|---------------------------------------------------|-------------------------------------------------------------------------------------|-------------|--------|---------------------------------------------------|--------------------|
| No.22 | Tashinone IIA                                     | 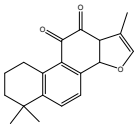   | 568-72-9    | 294.35 | the National Institutes for Food and Drug Control | Fig.4              |
| No.23 | Danshenol A                                       |    | 189308-08-5 | 336.38 | the National Institutes for Food and Drug Control | Fig.4              |
| No.24 | Dihydrotanshinone I                               |    | 87205-99-0  | 278.30 | the National Institutes for Food and Drug Control | Fig.4              |
| No.25 | Methyl palmitelaidate                             |    | 10030-74-7  | 268.44 | J&K Scientific                                    | Fig.5              |
| No.26 | 5,8,11,14,17-Eicosapentaenoic acid, ethyl ester   |    | 84494-70-2  | 330.50 | J&K Scientific                                    | Fig.5              |
| No.27 | 4,7,10,13,16,19-Docosahexaenoic acid, ethyl ester |    | 84494-72-4  | 356.54 | J&K Scientific                                    | Fig.5              |
| No.28 | Etistradiol                                       |  | 57-63-6     | 296.40 | Acros                                             | Fig.S10b & Fig.S12 |
| No.29 | Fluorene                                          |  | 86-73-7     | 166.22 | Macklin                                           | Fig.S6 & Fig.S8a   |
| No.30 | Benzoic acid                                      |  | 65-85-0     | 122.12 | Macklin                                           | Fig.S6 & Fig.S8a   |
| No.31 | Butyl p-hydroxybenzoate                           |  | 94-26-8     | 194.23 | Macklin                                           | Fig.S6             |
| No.32 | Thymine                                           |  | 65-71-4     | 126.11 | Macklin                                           | Fig.S6 & Fig.S8b   |
| No.33 | Phloroglucinol                                    |  | 108-73-6    | 126.11 | Acros                                             | Fig.S6             |
| No.34 | Uridine                                           |  | 58-96-8     | 244.20 | Macklin                                           | Fig.S6             |
| No.35 | naphthalene                                       |  | 91-20-3     | 128.17 | Macklin                                           | Fig.S8a            |

|             |                    |                                                                                     |          |        |                                                            |                         |
|-------------|--------------------|-------------------------------------------------------------------------------------|----------|--------|------------------------------------------------------------|-------------------------|
| No.36       | dimethyl phthalate | 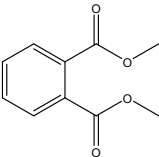   | 131-11-3 | 194.18 | Macklin                                                    | Fig.S8a                 |
| No.37       | aniline            |    | 62-53-3  | 93.13  | Macklin                                                    | Fig.S8a                 |
| No.38       | coumarin           |    | 91-64-5  | 146.14 | Acros                                                      | Fig.S8b                 |
| No.39       | caffeine           |    | 58-08-2  | 194.19 | Macklin                                                    | Fig.S8b                 |
| No.40       | prednisone         |    | 53-03-2  | 358.43 | Acros                                                      | Fig.S8b                 |
| No.29<br>41 | Androstenedione    |   | 63-05-8  | 286.41 | Acros                                                      | Fig.S12                 |
| No.42       | Corticosterone     |  | 50-22-6  | 346.46 | Acros                                                      | Fig.S12                 |
| No.43       | Piperine           |  | 94-62-2  | 285.34 | the National<br>Institutes for<br>Food and Drug<br>Control | Fig.S13                 |
| No.44       | Capsaicine         |  | 404-86-4 | 305.41 | Macklin                                                    | Fig.S13                 |
| No.45       | Evodiamine         |  | 518-17-2 | 303.36 | Macklin                                                    | Fig.S13                 |
| No.46       | Theobromine        |  | 83-67-0  | 180.16 | Macklin                                                    | Fig.S13                 |
| No.47       | Colchicine         |  | 64-86-8  | 399.44 | J&K Scientific                                             | Fig.S13                 |
| No.48       | Flavone            |  | 525-82-6 | 222.24 | Macklin                                                    | Fig.S13<br>&<br>Fig.S8b |

|       |               |                                                                                   |           |        |         |         |
|-------|---------------|-----------------------------------------------------------------------------------|-----------|--------|---------|---------|
| No.49 | Daidzein      | 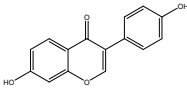 | 486-66-8  | 254.24 | Merck   | Fig.S13 |
| No.50 | Liquiritoside |  | 551-15-5  | 418.39 | Macklin | Fig.S13 |
| No.51 | Puerarin      |  | 3681-99-0 | 416.38 | Macklin | Fig.S13 |

J&K Scientific (Beijing, China); Merck (Darmstadt, Germany); Macklin (Shanghai, China); the National Institutes for Food and Drug Control (Beijing, China); Acros (Fair Lawn, NJ, USA); Sigma-Aldrich (St. Louis, MO, USA).

## references

1. L. P. Cheng, J. F. Cai and Y. X. Ke, *Journal of Inorganic and Organometallic Polymers and Materials*, 2019, **29**, 1417-1421.
